# Supplementary material
Source: publisher figshare collection journal article supplement (https://acs.figshare.com/ndownloader/files/4201894)
Supplement: Supplementary file 1 [file 4201894]

## Supporting Information

### **Amine-Functionalized Lanthanide-Doped KGdF<sub>4</sub> Nanocrystals as Potential Optical/Magnetic Multimodal Bioprobes**

Qiang Ju,<sup>†</sup> Datao Tu,<sup>†</sup> Yongsheng Liu,<sup>†</sup> Renfu Li,<sup>†</sup> Haomiao Zhu,<sup>†,‡</sup> Jincan Chen,<sup>‡</sup> Zhuo Chen,<sup>‡</sup>  
Mingdong Huang,<sup>‡</sup> and Xueyuan Chen<sup>\*,†,‡</sup>

<sup>†</sup>*Key Laboratory of Optoelectronic Materials Chemistry and Physics, Fujian Institute of Research on the Structure of Matter, Chinese Academy of Sciences, Fuzhou, Fujian 350002, China*

<sup>‡</sup>*State Key Laboratory of Structural Chemistry, Fujian Institute of Research on the Structure of Matter, Chinese Academy of Sciences, Fuzhou, Fujian 350002, China*

<sup>\*</sup>*xchen@fjirsm.ac.cn*

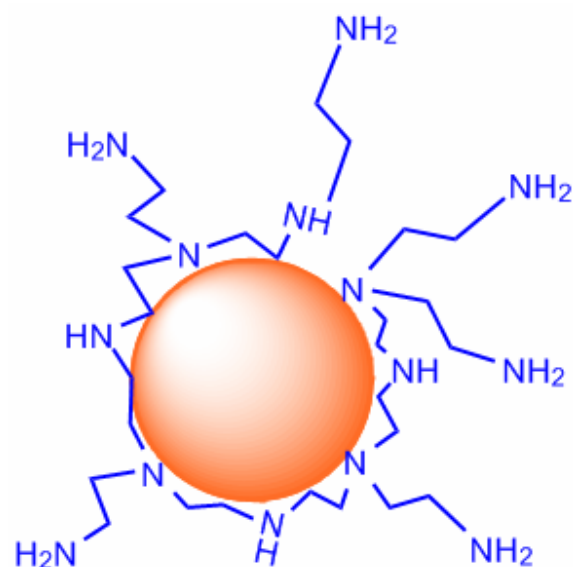

**Figure S1.** Schematic illustration of PEI-coated  $\text{KGdF}_4\text{:Ln}^{3+}$  NCs. The uncoordinated amino groups of branched PEI extend into the aqueous solution, rendering the NCs water-soluble and functionalized for further linkage of biomolecules through bioconjugate chemistry.<sup>[1]</sup>

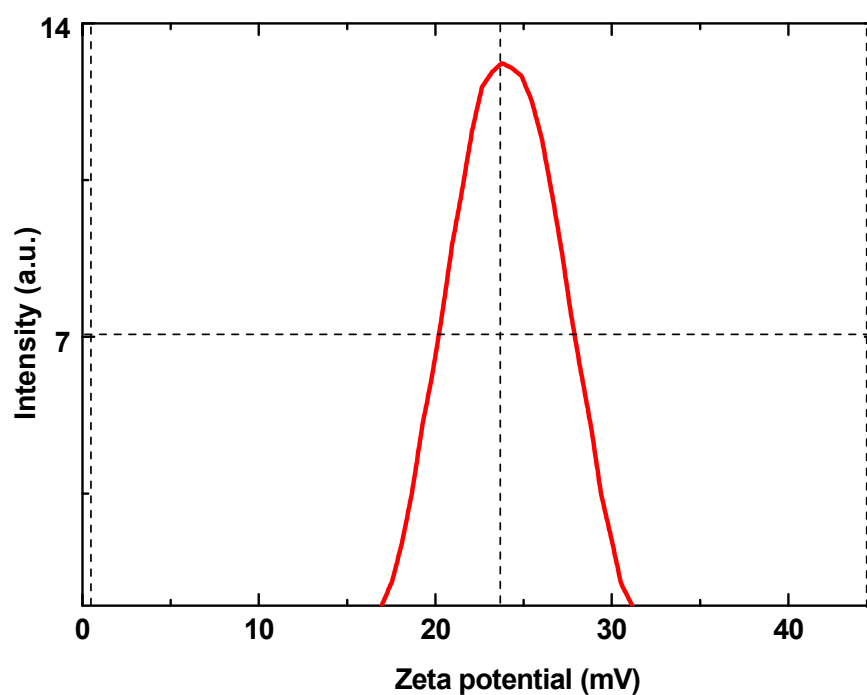

**Figure S2.**  $\zeta$ -potential for PEI capped KGdF<sub>4</sub> NCs obtained from the dynamic light scattering. The  $\zeta$ -potential for PEI capped KGdF<sub>4</sub> NCs dispersed in aqueous solution (pH = 7.6) was determined to be +23.2 mV.

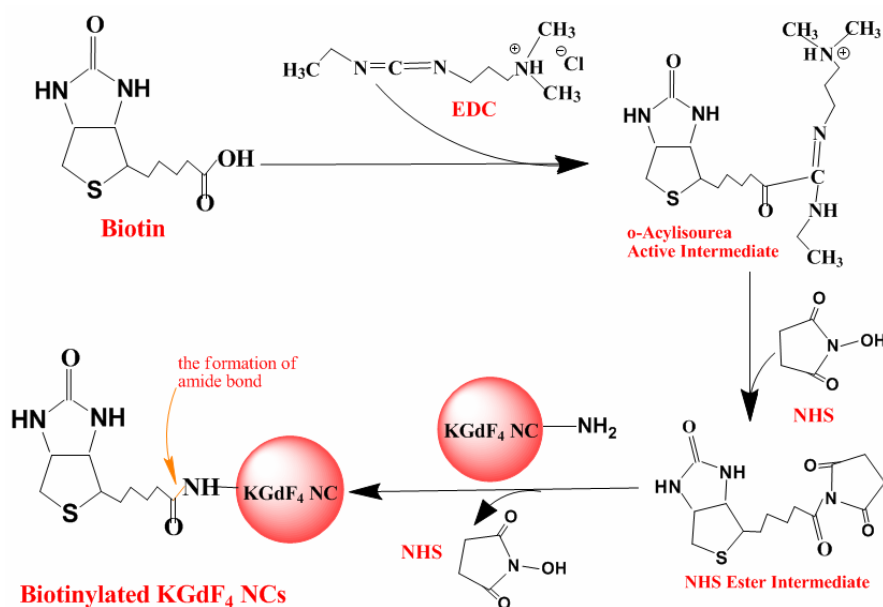

**Figure S3.** Schematic illustration of the bioconjugation of KGdF<sub>4</sub> NC with biotin through a well-established protocol by employing 1-ethyl-3-(3-dimethyl-aminopropyl) carboxylate (EDC) and N-hydroxysuccinimide (NHS) as cross-linking reagents. The EDC firstly reacts with the surface carboxyl (-COOH) groups on the biotin to yield an O-acylisourea active intermediate. Then this intermediate reacts with the NHS to generate a more stable active NHS ester intermediate. Finally, this intermediate is attacked by a primary amine (NH<sub>2</sub>) group on the KGdF<sub>4</sub> NCs, forming a stable amide covalent bond between the biotin and the NCs.

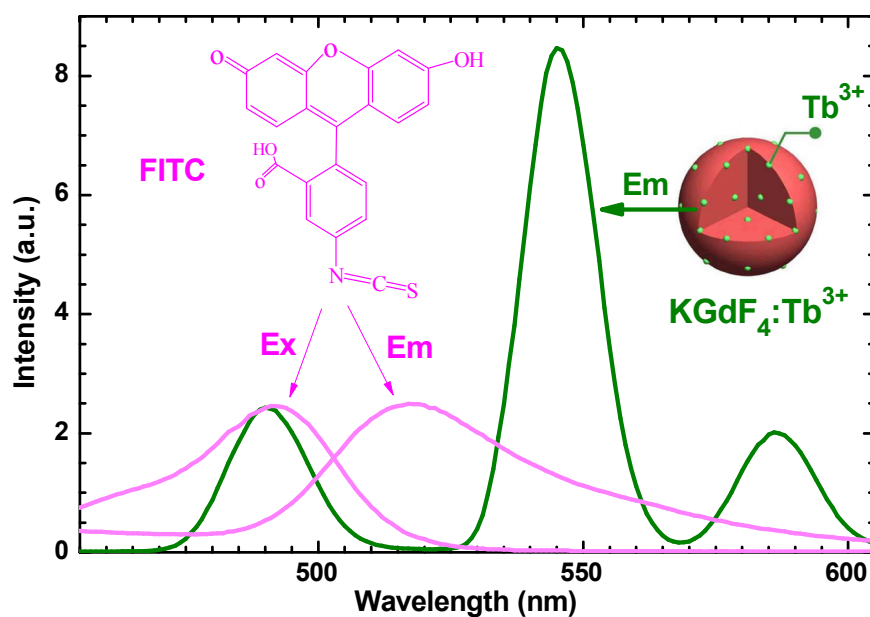

**Figure S4.** RT emission spectrum of KGdF<sub>4</sub>:Tb<sup>3+</sup> NCs (green); RT excitation and emission spectra (pink) of FITC. The excitation peak of FITC matches well with the emission band of Tb<sup>3+</sup> centered at 488 nm, and the emission peak of FITC at 518 nm is located within the gap between two emission peaks of Tb<sup>3+</sup> (488 and 545 nm). Accordingly, FITC and KGdF<sub>4</sub>:Tb<sup>3+</sup> NCs are selected as energy acceptor and energy donor in TR-FRET assays, respectively.

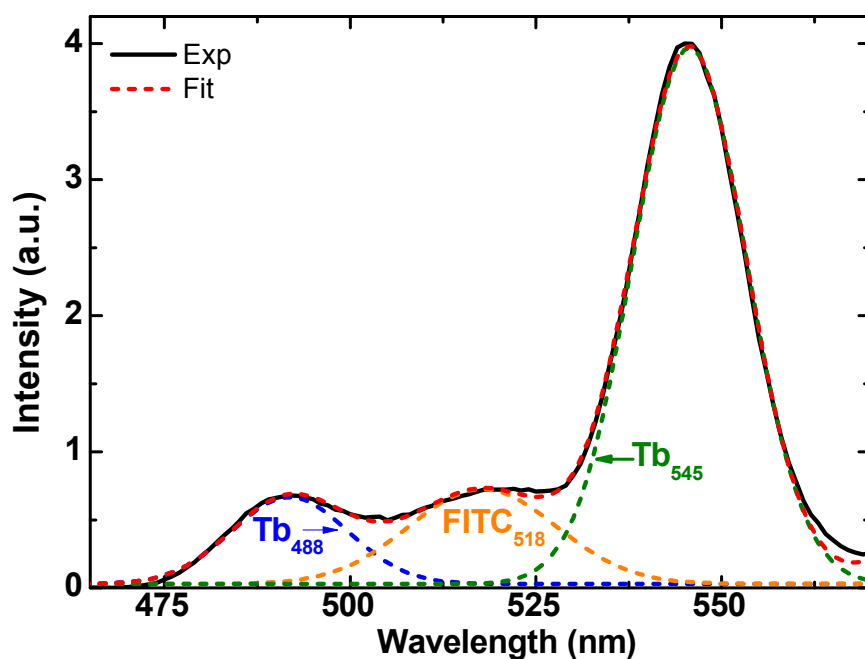

**Figure S5.** An example showing the determination of the integrated PL intensities of Tb<sub>488</sub> and FITC<sub>518</sub> from the deconvolution of the TR-FRET spectrum. The experimentally observed spectrum within 470-570 nm was best fit and deconvoluted to three Gaussian curves with their peaks centered at 488, 518 and 545 nm, respectively.

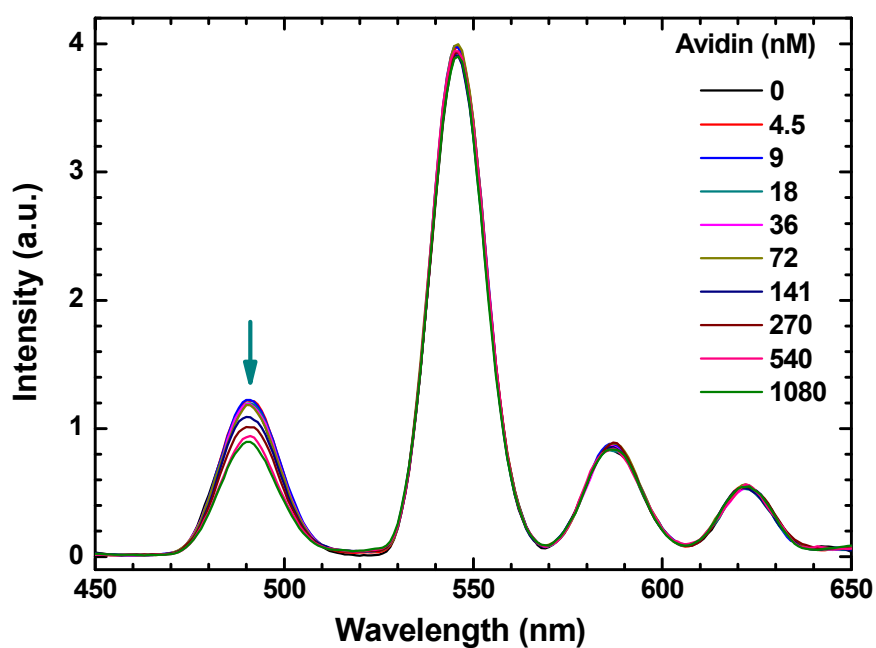

**Figure S6.** TR-FRET spectra for the control experiments by employing the as-prepared NCs instead of the biotinylated NCs as bioprobes under otherwise identical conditions, where no binding and hence no FRET occurs. The spectra were measured at different concentration of FITC-labeled avidin as indicated (nM) and normalized to unity at the maximum emission peak at 545 nm. Each data point represents average of quintuplicate measurements.

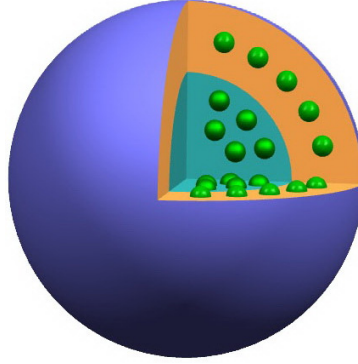

**Figure S7.** Schematic illustration of KGdF<sub>4</sub> NCs in longitudinal relaxation measurement. To quantitatively estimate the longitudinal relaxivity per KGdF<sub>4</sub> NC, we assume that only Gd<sup>3+</sup> ions residing within a spherical shell (< 5 nm) of each KGdF<sub>4</sub> NC (diameter of 25 nm) contribute to the observed relaxivity, based on the fact that the close-to-surface Gd<sup>3+</sup> ions in NCs play a dominant role in changing the relaxation of the water proton.<sup>[2]</sup> The number of Gd<sup>3+</sup> ions  $N_{Gd}$  in the surface shell of one KGdF<sub>4</sub> NC can be calculated by the following equation to be  $6.82 \times 10^4$ , and the longitudinal relaxivity per KGdF<sub>4</sub> NC  $r_{NC}$  was then calculated to be  $3.99 \times 10^5 \text{ S}^{-1} \cdot \text{mM}^{-1}$ .

$$N_{Gd} = \frac{4}{3} \times \pi \times (r_0^3 - r_{core}^3) \times 2/a^3$$

$$r_{NC} = r_1 \times N_{Gd}$$

where  $r_0$  is the radius of KGdF<sub>4</sub> NC, which is 12.5 nm;  $r_{core}$  is the inner radius of KGdF<sub>4</sub> NC, which is 7.5 nm; the space group of cubic KGdF<sub>4</sub> is  $Fm\bar{3}m$  with unit cell  $a = 5.73 \text{ \AA}$ ,<sup>[3]</sup> and every unit cell contains two KGdF<sub>4</sub> molecules.



## References

- (1) Yi, G. S.; Peng, Y. F.; Gao, Z. Q. *Chem Mater* **2011**, *23*, 2729.
- (2) Park, Y. II.; Kim, J. H.; Lee, K. T.; Jeon, K.-S.; Na, H. B.; Yu, J. H.; Kim, H. M.; Lee, N.; Choi, S. H.; Baik, S.-II.; Kim, H.; Park, S. P.; Park, B.-J.; Kim, Y. W.; Lee, S. H.; Yoon, S.-Y.; Song, I. C.; Moon, W. K.; Suh, Y. D.; Hyeon, T. *Adv Mater* **2009**, *21*, 4467.
- (3) Wong, H.-T.; Vetrone, F.; Naccache, R.; Chan, H. L. W.; Hao, J.; Capobianco, J. A. *J. Mater. Chem.* **2011**, *21*, 16589.
